# Supplementary material
Source: PubMed Central journal article supplement (PMC4233207)
Supplement: NIHMS586227-supplement-01.pdf [file NIHMS586227-supplement-01.pdf]

Supplemental Figure 1: Confirmatory factor loadings:

A. COGA sample

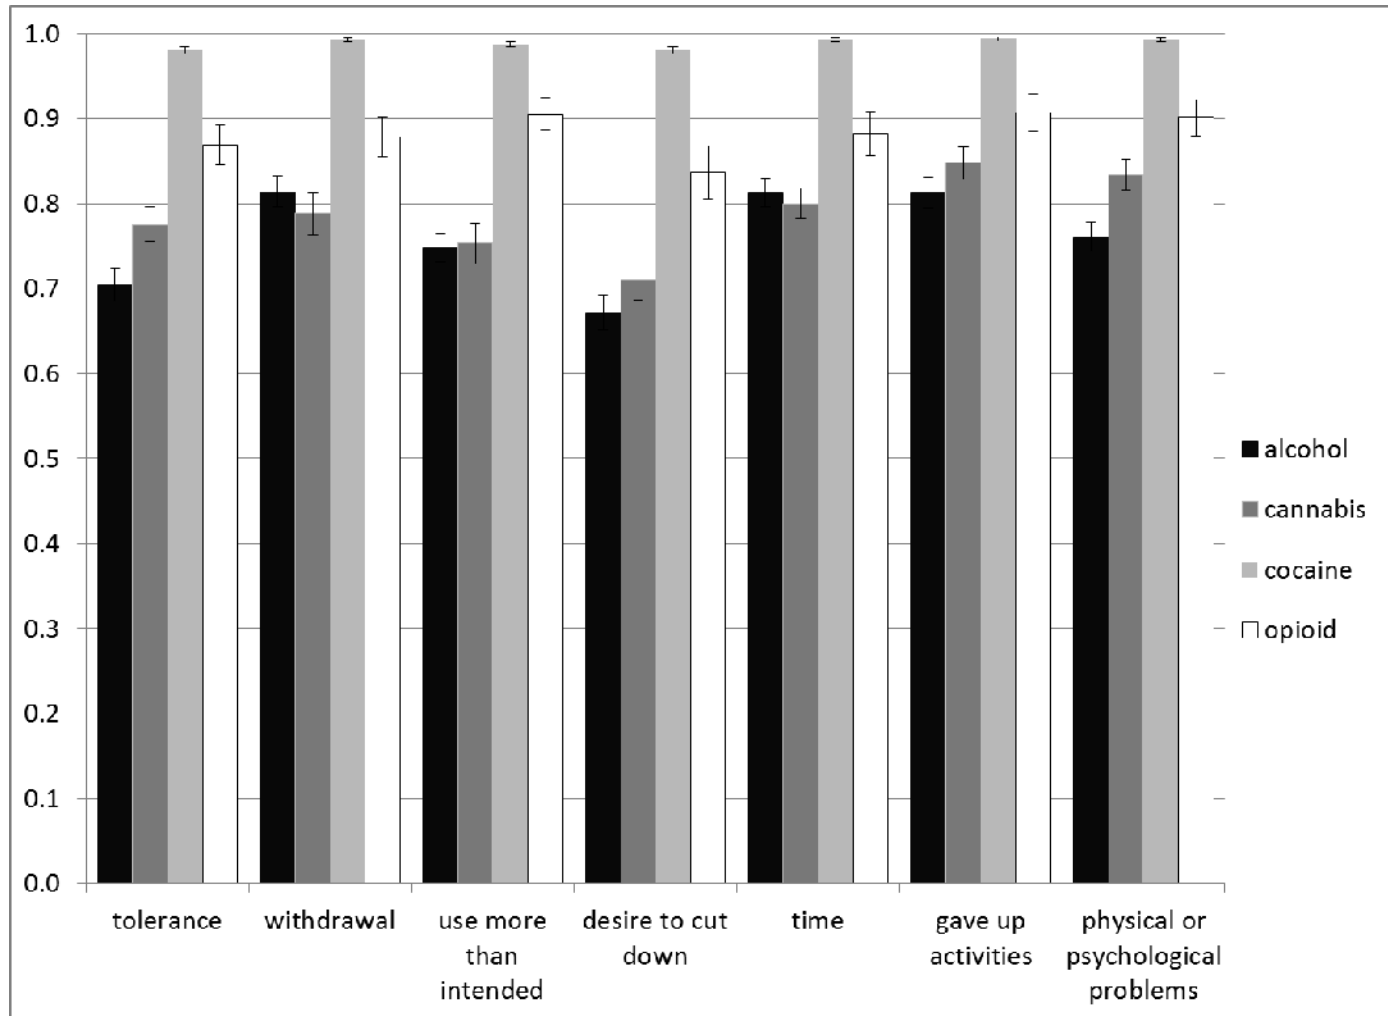

### Supplemental Figure 1: Confirmatory factor loadings

#### B. SAGE sample.

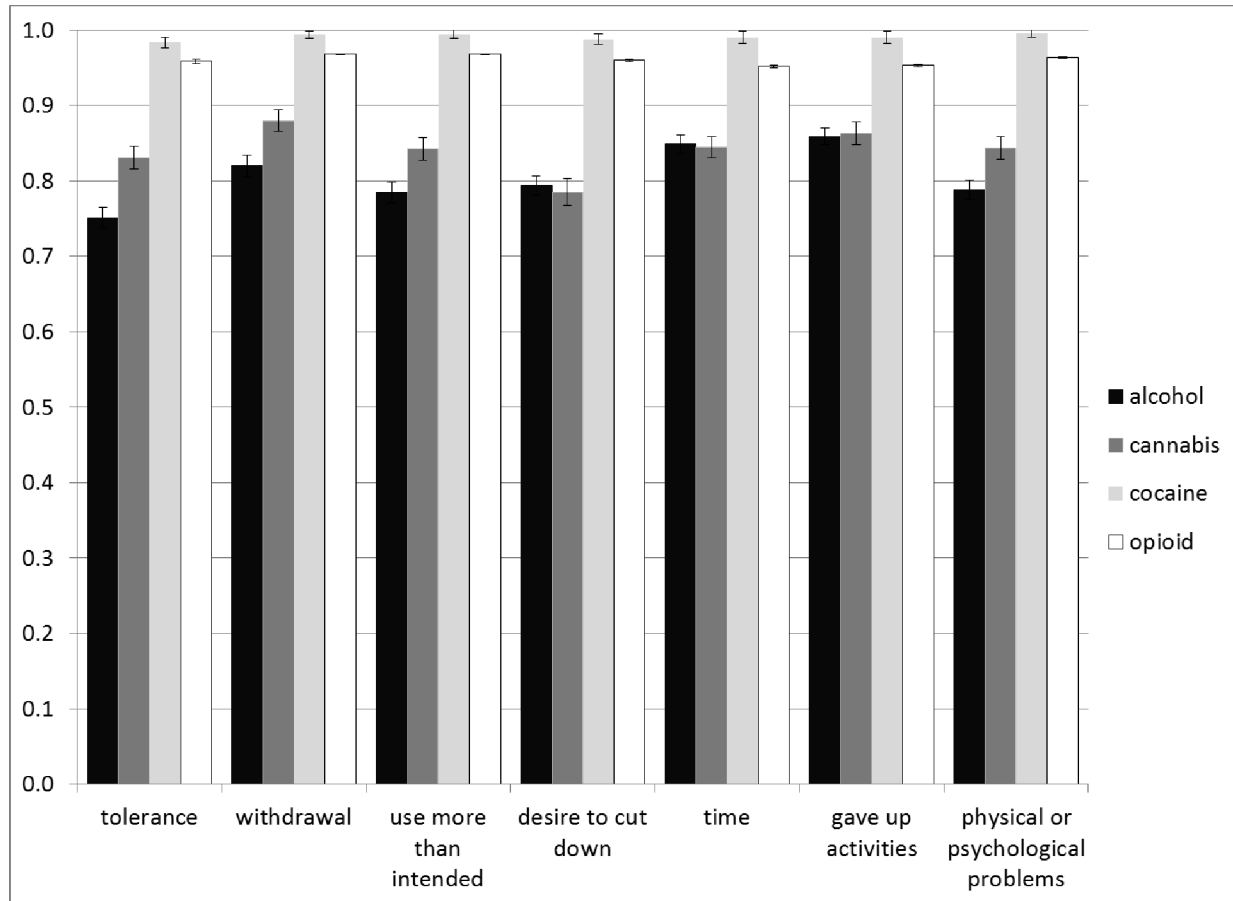

Supplemental Figure 2: QQ plots:

A. ANYDEP, genomic-control p-values;

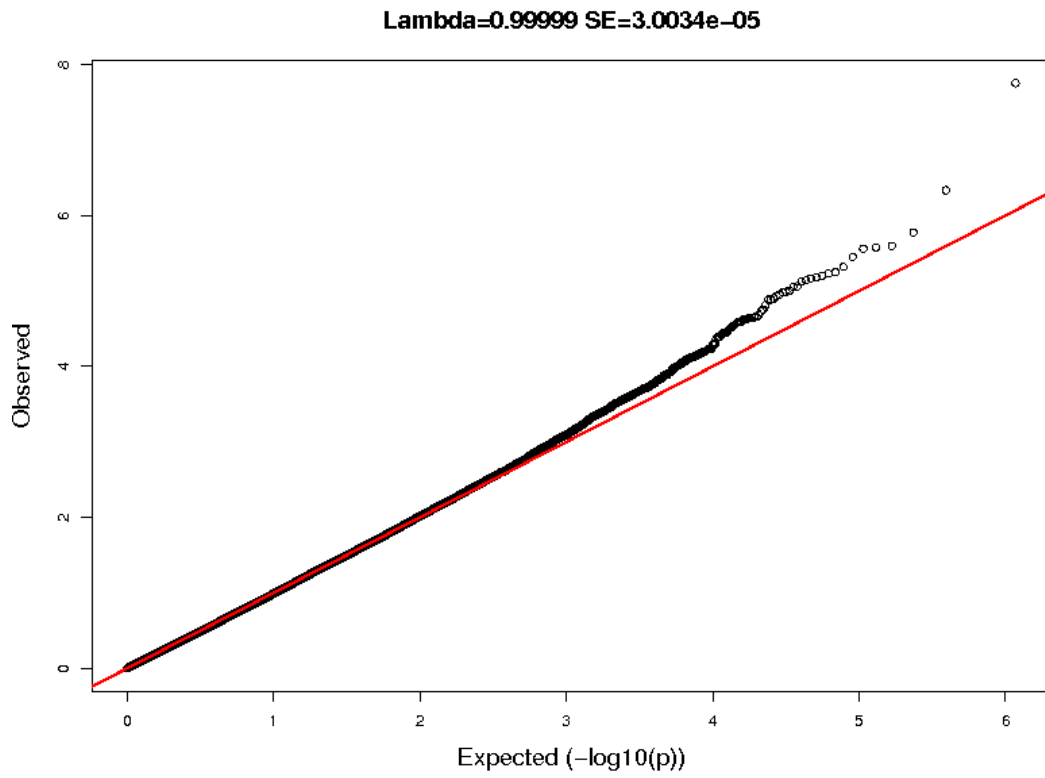

Supplemental Figure 2: QQ plots

B. QUANTDEP.

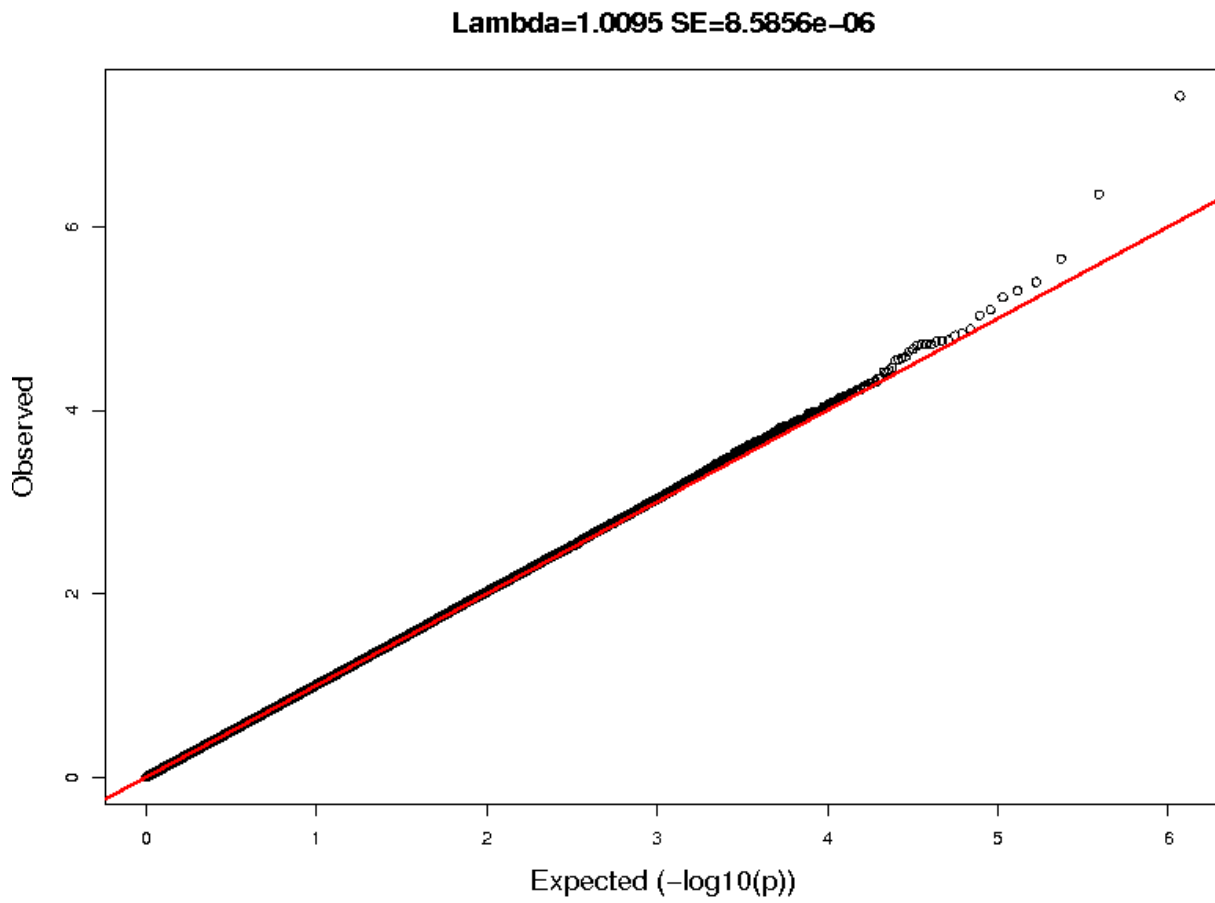

**Supplemental Table 1: Summary of association results for SNPs with  $p < 10^{-5}$  for either trait. Results with  $p < 10^{-5}$  are in bold.**

| Chr <sup>a</sup> | Position <sup>b</sup> | SNP <sup>c</sup> | MAF <sup>d</sup> | Gene <sup>e</sup>  | ANYDEP          | QUANTDEP        |
|------------------|-----------------------|------------------|------------------|--------------------|-----------------|-----------------|
| 1                | 2,944,527             | rs2142569        | 0.34             | ACTRT2 (5kb)       | 4.60E-03        | <b>4.00E-06</b> |
| 1                | 192,902,415           | rs842796         | 0.38             | LOC730190 (60kb)   | 2.99E-03        | <b>2.24E-06</b> |
| 1                | 234,427,534           | rs594349         | 0.34             | SLC35F3            | <b>3.55E-06</b> | 2.75E-02        |
| 2                | 129,990,869           | rs13033217       | 0.45             | LOC151121 (8kb)    | <b>7.18E-06</b> | 5.38E-04        |
| 2                | 129,998,443           | rs2952621        | 0.47             | LOC151121 (1kb)    | <b>1.77E-08</b> | 3.85E-05        |
| 2                | 130,007,750           | rs2197022        | 0.50             | LOC151121 (7kb)    | <b>2.53E-06</b> | 1.97E-04        |
| 2                | 130,034,326           | rs7567687        | 0.46             | LOC151121 (33kb)   | <b>8.64E-06</b> | 1.03E-03        |
| 3                | 62,263,047            | rs2291540        | 0.09             | PTPRG              | 3.20E-03        | <b>5.01E-06</b> |
| 3                | 143,090,003           | rs7619769        | 0.40             | SLC9A9             | <b>4.78E-06</b> | 4.47E-04        |
| 3                | 143,090,698           | rs11715693       | 0.41             | SLC9A9             | <b>8.79E-06</b> | 2.66E-03        |
| 3                | 164,558,595           | rs9847462        | 0.12             | SI (138kb)         | <b>2.64E-06</b> | 8.38E-05        |
| 4                | 81,068,101            | rs13129263       | 0.12             | RPSAP39 (14kb)     | 2.44E-03        | <b>9.21E-06</b> |
| 4                | 81,087,073            | rs13138779       | 0.08             | RPSAP39 (3kb)      | 1.62E-02        | <b>7.99E-06</b> |
| 4                | 178,317,692           | rs1506807        | 0.25             | NEIL3 (33kb)       | 9.12E-04        | <b>4.43E-07</b> |
| 6                | 155,759,778           | rs9322524        | 0.14             | NOX3               | 2.84E-01        | <b>5.84E-06</b> |
| 8                | 25,648,792            | rs1978544        | 0.09             | EBF2 (52kb)        | <b>1.68E-06</b> | 2.26E-02        |
| 8                | 96,536,023            | rs11776832       | 0.33             | LOC100616530       | <b>5.63E-06</b> | 5.73E-04        |
| 12               | 7,383,187             | rs7962099        | 0.10             | LOC100420983 (6kb) | <b>5.90E-06</b> | 8.26E-04        |
| 12               | 96,923,355            | rs7314750        | 0.45             | C12orf55           | <b>9.93E-06</b> | 3.80E-03        |
| 16               | 12,590,176            | rs9806891        | 0.14             | SNX29              | <b>7.55E-06</b> | 2.30E-05        |
| 17               | 74,988,840            | rs3848391        | 0.17             | MGAT5B (42kb)      | <b>6.27E-06</b> | 7.68E-03        |
| 17               | 74,995,894            | rs4789398        | 0.37             | MGAT5B (49kb)      | <b>6.61E-06</b> | 2.04E-02        |
| 18               | 6,868,925             | rs2567261        | 0.08             | ARHGAP28           | 3.18E-04        | <b>3.76E-08</b> |
| 22               | 26,713,964            | rs6519647        | 0.44             | SEZ6L              | <b>4.62E-07</b> | 2.71E-04        |
| 22               | 26,715,923            | rs3788378        | 0.44             | SEZ6L              | <b>6.78E-06</b> | 1.57E-04        |

<sup>a</sup> Chromosome;

<sup>b</sup> Chromosomal position (base pairs) based on human genome build 19, dbSNP 137

<sup>c</sup> Single Nucleotide Polymorphism

<sup>d</sup> Minor allele frequency estimated on founders

<sup>e</sup> Gene name and (distance to nearest gene)
